## Application of optical properties in water purification quality testing

Mohamed M. M. Eid<sup>a,\*</sup>, N. M. EL-Biale<sup>b</sup>, Hosam Elhegazy<sup>IWA</sup><sup>c</sup>, S. I. El-Khatib<sup>a</sup>  
and H. E. Hassan<sup>d</sup>

<sup>a</sup> Irrigation and Drainage Engineering Department, Agricultural Eng. Res. Inst. (AEnRI), Agricultural Research Center (ARC), Cairo, Egypt

<sup>b</sup> Biological Engineering Department, Agricultural Eng. Res. Inst. (AEnRI), Agricultural Research Center (ARC), Cairo, Egypt

<sup>c</sup> Structural Engineering and Construction Management Department, Faculty of Engineering and Technology, Future University in Egypt, Cairo, Egypt

<sup>d</sup> Laser Application in Agriculture, National Inst. of Laser Enhanced Science (NILES), Cairo University, Cairo, Egypt

\*Corresponding author. E-mail: mmoustafa.m16@gmail.com

### Abstract

The current study was performed to test filtration media system performance on quality of water purification and to evaluate optical properties, such as reflection, transmission and absorption intensities for filtered water using a spectrophotometer operating in the range 350–400 nm. Head losses through filtration system at the experiments were equal to 20, 40, and 60 kPa. With the progress of the filtration process and increase in different head loss (from 20 to 60 kPa), both the content of total suspended solids and turbidity in optical properties intensities for filtrated water increased, together with the water cloudiness. It is shown that the intensity of optical properties can be considered a reliable indicator that to determine the need for backwashing of the filtration system.

**Key words:** filter backwashing, media, removal efficiency, total suspended solids, turbidity

### Highlights

- Local gravel samples are high quality and easy to use in the Egyptian natural environment.
- Gravel or sand media filters are particularly suitable for water with a high TSS content.
- Optical properties are known to be the best indicator for filtering backwashing.

### LIST OF ABBREVIATIONS

|                 |                        |
|-----------------|------------------------|
| Tu              | Turbidity              |
| TSS             | Total suspended solids |
| Ref             | Reflection             |
| Trans           | Transmission           |
| Abs             | Absorption             |
| fw              | Filtered water         |
| Er              | Removal efficiency     |
| hl <sub>m</sub> | Head losses            |
| C <sub>c</sub>  | Curvature coefficient  |

This is an Open Access article distributed under the terms of the Creative Commons Attribution Licence (CC BY 4.0), which permits copying, adaptation and redistribution, provided the original work is properly cited (<http://creativecommons.org/licenses/by/4.0/>).

## INTRODUCTION

Micro-irrigation systems (MIS) (surface drip irrigation and subsurface drip irrigation) are an appealing choice for saving water in Egypt, where water resources are limited (Puig-Bargués *et al.* 2010). The emitter can discharge a large amount of sediment particles, depending on the hydraulic shear force (Feng *et al.* 2018).

Filter clogging is a substantial problem, in the case of surface water sources (open channels, rivers or lakes) for these systems where the irrigation water usually is not found in its pure state, but mostly with foreign solid particles and other impurities, especially when treated wastewater of low quality is used because it contains high concentrations of dissolved and suspended solids (Bucks *et al.* 1979; Ravina *et al.* 1997). Solid particles, mainly including impurities, non-organic matters (trash, silt, sand, leaves, fine clay and rust dust), organic matter (algae, bacteria and protozoa), and other solid contaminants, are present in irrigation water (Eurodrip 1999; Zhou *et al.* 2017).

The total amount of suspended solids in Alabaster Misr Bank water samples was less than that of Ward El-Nile Zaffaran at the same operating pressure. While evaluating the efficiency of the dripper using suitable filtration media for the first filter, it was found that 94.73, 89.55 and 79.65% of the local basalt emission uniformity was excellent, good and fair, respectively, and 95.84, 89.66, and 79.57% of the second Alabaster Misr Bank filter at 20, 40 and 60 kPa EU was excellent (Hassan *et al.* 2019). The filtration is an important process that can help avoiding physical clogging of MIS (Kuslu & Sahin 2013; Bounoua *et al.* 2016). It is the physical management that is used to maintain the closed irrigation system at a satisfactory performance (Oron *et al.* 1979; El Awady *et al.* 2001). Screens, discs and sand-gravel media are the main filter types used in MIS. Sand or gravel filtering followed by screen and disc filters (Puig-Bargués *et al.* 2005a) are those that provide MIS with better protection (Capra & Scicolone 2004; Hamoda *et al.* 2004; Burt & Styles 2007; Trooien & Hills 2007) because they exhibit the highest removal efficiency ( $E_r$ ) for total suspended solids (TSS) organic compounds, phosphorus and microorganisms (Naghavi & Malone 1986; Haman *et al.* 1994; Capra & Scicolone 2007; Dalahmeh *et al.* 2012).

In media filters, solids (very fine sand, silt, and clay particles, algae and bacteria) are trapped by the particles of gravel or sand where particle capture is controlled by both physical and chemical mechanisms (Adin & Alon 1986). This process decreases the rate of water flow through the filtration system because the system is clogged and must be cleaned in order to recover operating conditions through a backwashing procedure (Shock 2006). Most sand or gravel filters are cleaned automatically by backwashing frequently (Pitts *et al.* 1990; Nakayama *et al.* 2007). Automatic backwashing can be managed by an operating time and/or by passing water flow at the total pressure drop across the filters of 50 kPa for sand or gravel filters and 40 kPa for screen and disc filters. Usually, a backwashing time from 20 to 180 s is used (Ravina *et al.* 1992; Elbana *et al.* 2012). Both options allow for easy system automation (Duran-Ros *et al.* 2009). Unfortunately, during the filtration process, large and interconnected pores called 'Rat Holes' can form in the media leading to decreasing filter performance (Nakayama *et al.* 2007).

Remote sensing (RS) is usually restricted to methods that detect and measure electromagnetic energy, including visible and non-visible radiation that interacts with surface materials, and an idea of providing RS by deriving information on optical properties and the concentrations of substances from variations in the color of the water. The variables of water quality; that is, TSS, Tu, the content of humic substances, chlorophyll, and so on, could be estimated by a variety of techniques for remote and optical sensing (Morel & Prieur 1977; Dekker 1993; Bukata *et al.* 1995; Rev-Herlevi 2002; Arst 2003; Pozdnyakov & Grassl 2003; Reinart *et al.* 2004; Gallegos *et al.* 2008), by interpreting the received radiance at different wavelengths (Yentsch 1984). TSS is the regulatory positively or negatively correlated indicator of 'suspended sediment pollution' (Wang *et al.* 2010). Besides, water clarity or Tu is a direct measure of visible distance through water. It is an important indicator of

the presence of sediments in the water column, and a useful parameter for determining the content of TSS and dissolved materials (Davies-Colley & Smith 2000). Therefore (Ceccato *et al.* 2001; Doxaran *et al.* 2002; Dolinar 2014), using visible and near-infrared (NIR) wavelength satellite data and multi-spectral optical sensors and visible to infrared optical sensors, the water composition can be determined in terms of Tu and TSS by measuring part of the visible light transmitted through them in a straight line between the light source and the light receiver, or part of the visible or infrared light that is reflected (Williamson & Crawford 2011).

Optical multispectral sensors give reliable and accurate readings for TSS in the range of 0 to 500 mgL<sup>-1</sup> (Al-Yaseri *et al.* 2013). In addition, it was concluded (Hassan *et al.* 2020) that 632.8 nm is a suitable wavelength to study the optical properties of filtrated water over local basalt media under different head losses through filter media using a He-Ne laser.

Elhegazy & Eid (2020) introduced a review of the research that covered grey-water management. It provided perspectives on grey-water context in order to frame the breadth and multiple dimensions it encompasses, to summarize recent activities on selected relevant topics, and to highlight possible future directions in research and implementation.

---

## PROBLEM STATEMENT AND RESEARCH OBJECTIVE

There is a deficiency in the use of modern technology in the management of irrigation systems, including the filtering system used, caused by the lack of reliable data on optical properties of filtrated water, which is a motivation of the work performed.

---

## MATERIALS AND METHODS

Current assay was conducted between July and December 2019, at the National Irrigation Laboratory of Agricultural Engineering Research Institute (AEnRI), ARC, and the laboratory of laser applications in agricultural engineering at the National Institute of Laser Enhanced Science (NILES), Cairo University, to detect optical properties for filtrated water under various operating conditions, using a spectrophotometer. The filter unit was the main component of the experiment. It had a cylindrical shape with a diameter of 600 mm, height of 900 mm, depth of 600 mm and surface area of 0.471 m<sup>2</sup>, maximum volume of 33.9 m<sup>3</sup> h<sup>-1</sup>, and inlet and outlet links with a diameter of 50 mm.

Local basalt gravel media had a bulk density ( $\rho$ ) of  $\approx 1.68$  gcm<sup>-3</sup>, porosity ( $n$ ) of 43.41%, and pH and CaCO<sub>3</sub> values of 7.3 and 0.5% respectively. Local basalt gravel was sourced from the local market (Abo-Zaable, Qaibia government) and mainly used for building construction. For this substance, effective diameters ( $d_e$ ) (size opening that will pass 10% by dry weight of a representative sample of the filter material) were 1.19, 1.75, and 2.32 mm for  $d_{10}$ ,  $d_{50}$ , and  $d_{60}$  respectively. The particle size parameters; that is, the uniformity coefficient ( $C_U$ ) (ratio of the size of opening that will pass 60% of the sand to the size of opening that will pass 10%) and curvature 114 coefficients ( $C_c$ ) were 1.94 and 1.11 respectively.

For filtration experiments, a filtration system with three-filter units was used. This consisted of a 22 kW pump, with a pressure head of 550 kPa (approximately 5.5 bar) and a flow rate of about 100 m<sup>3</sup> h<sup>-1</sup>, which injected Nile water from a concrete reservoir with a capacity of 8 m<sup>3</sup>. Each filtration unit had a pressure gauge and valve at the inlet and outlet of the system to monitor head losses through the  $hl_m$  filter bed (to increase  $hl_m$  the inlet flow volume to the filtration system was increased and the outlet volume of the inlet flow decreased). The experimental setup allowed that all filters were operating at a time; experiments were carried out, for 80 h, for 4 h day<sup>-1</sup>. Experimental measurements to assess filter performance were carried out at the beginning of each 20 h under three  $hl_m$  (20, 40, and 60 kPa). The effectiveness of a filter (removal efficiency  $E_r$  was computed by measuring the ability of

the gravel media filter to remove suspended particles and turbidity from the inlet water. The evaluation of the  $E_r$  followed the measurements of the TSS and  $T_u$  of water samples before and after the filter unit. Turbidity ( $T_u$ ) was measured using an HI 93703 handheld turbidity meter (Hanna Instruments, Woonsocket, RI, USA), and TSS were determined in the laboratory by the gravimetric method. Forty samples (8 samples  $\times$  five replicates) were taken periodically at the filter inlet and outlet to calculate the average value through the whole experiment. Additionally,  $E_r$  was calculated according to the equation as seen below (ASAE 2005).

$$E_r = \left( \frac{Y_i - Y_o}{Y_i} \right) \times 100$$

where,  $E_r$  (%) is the removal efficiency for a physical parameter with  $Y$  being TSS ( $\text{mgL}^{-1}$ ) or  $T_u$  (FNU) – Formazin Nephelometric Units –  $Y_i$  being the physical parameter value before filtering and  $Y_o$  its value after filtration.

In addition, the spectrophotometer (Ocean Optics USB650) was used to detect suitable visible wavelength within the range  $\approx 350$ – $1,000$  nm to measure the peak values for a number of optical parameters. The measurements were of reflection (Ref), transmission (Trans) and absorption (Abs). All samples were made of particle suspensions contained in a 1-cm quartz cuvette that was placed inside the integrating sphere. The visible light was focused on one side of the quartz cuvette containing the sample. The emitted light was collected perpendicularly via a fiber optics connector (SAM 905 to single-strand optical fiber 0.22 NA). Acquisition and analysis of the spectra obtained from the spectrophotometer system were accomplished using the commercial SpectraSuite software and further processed using computer software.

## RESULTS AND DISCUSSION

The only parameters whose removal efficiency differed, caused by the different  $hl_m$ , were TSS ( $\text{mgL}^{-1}$ ) and turbidity  $T_u$  (FNU). This was in agreement with the previous experiments with Nile water (Adin & Elimelech 1989; Ravina *et al.* 1997; Elbana *et al.* 2012), using the same gravel filter.

- They have achieved reducing 'TSS' concentration sharply from 249.6 before filtration to 51.66, 115.06 and 129.29  $\text{mgL}^{-1}$  after filtration and  $E_r$  was about 79.3, 53.9 and 48.2% at  $hl_m \approx 20, 40$ , and 60 kPa, respectively.
- 10 h of the filtration system operation proved that sand or gravel filtration is the most efficient for reducing and removing TSS.
- The efficiency of suspended solids was reduced from 11.4 to 48.0% using the sand filter filled with different media.
- TSS concentration at fw increased slightly with increasing accumulated  $T$  (h) at different  $hl_m$  until the end of the experiment. The concentration of TSS in fw was increased from 51.67, 115.06, and 129.29  $\text{mg L}^{-1}$  after 10 h from the experiment beginning to 163.49, 226.14, and 268.81  $\text{mgL}^{-1}$  at the end of the experiment (80 h) under  $hl_m \approx 20, 40$ , and 60 kPa respectively (Figure 1). In addition, the outlet concentrations of 'TSS' increased logarithmically, linearity at  $hl_m \approx 20, 40$ , and 60 kPa respectively, from 10 to 80 h. So, it can be concluded that the solids accumulation in the filter beds increased logarithmically as the filtration test period progressed.
- Adin & Alon (1986), and Hassan *et al.* (2020) observed the same results. Figure 2 presents the turbidity  $T_u$  removal efficiency,  $E_r$  (%), computed using Equation (1). The values were measured at the filter inlet and outlet (just before and after filtering).
- The filter achieved a reduction of about 82.4, 62.1, and 54.79% of  $T_u$  in the first 10 h of the experiment at  $hl_m \approx 20, 40$ , and 60 kPa respectively. These are in agreement with those obtained by

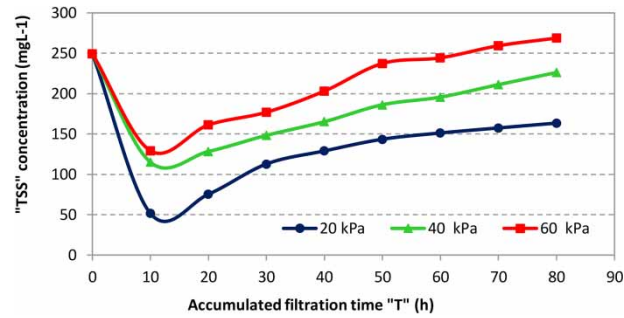

**Figure 1** | Behavior of TSS concentration during filtration process progress.

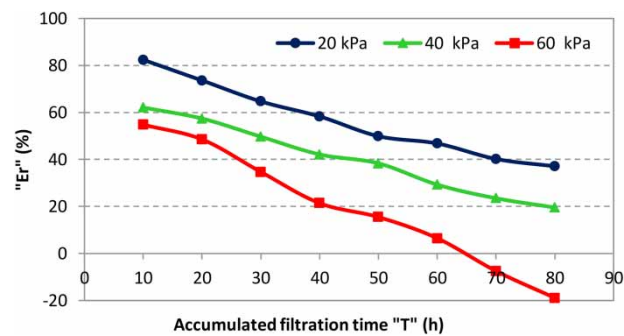

**Figure 2** | Behavior of Er for Tu during the filtration process, progress under different  $hl_m$  (kPa).

(Nakhla & Farooq (2003)). Then, Er for Tu tended to decrease at fw with the increase in the filtration test period. It had a negative relation with accumulated experiment time T (h).

- These relations were exponential at  $hl_m \approx 20$  kPa and linearity with  $hl_m \approx 40$  and 60 kPa, with correlation coefficient (R) of 0.998, 0.997, and 0.9964. The porous gravel media filter showed turbidity removals of 37.1, 19.55, and  $-18.9\%$  at the end of the experiment (after 80 h). These results could be in agreement with Tripathi *et al.* (2014), Solé-Torres *et al.* (2019).
- Generally, there was less Tu after the gravel filter at different  $hl_m$  than there was before for all experiments except after  $\approx 65$ –80 h with  $hl_m \approx 60$  kPa. Both Tu and TSS concentrations at the fw were larger than at the inlet, which tended to negative values for Er. Besides, these mean that the filter was clogged, probably due to filtration cake detachment as mentioned by Neis & Tiehm (1997) and Puig-Bargués *et al.* (2005b). Figure 3 shows the regressions plateau between Tu (FNU) and TSS (mg/L-1). Furthermore, Tu had a non-linear correlation with TSS. It was power-related with TSS at  $hl_m \approx 20$  kPa, and exponential – related at  $hl_m \approx 40$  and 60 kPa.

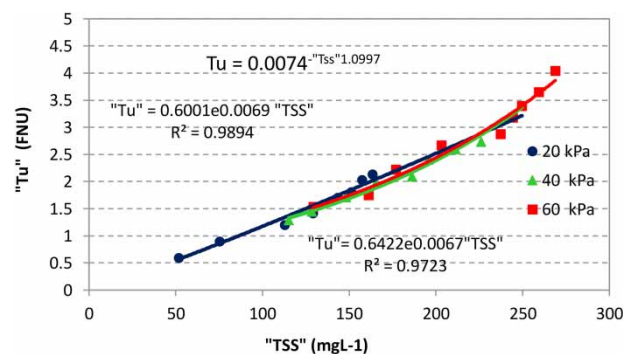

**Figure 3** | Correlation between the Tu and TSS at different  $hl_m$ .

Similar results were demonstrated by Wu *et al.* (2014), who indicated that height agreement was observed between the Tu and TSS. Water clarity was always 220 positively correlated with TSS (Bucks *et al.* 1979; Davies-Colley & Smith 2000; Wang *et al.* 2010).

The optical properties for fw were scanned in visible light wavelength from 350 to 1,000 nm. In addition, the curves of optical properties; that is, Ref, Trans, and Abs, (%), were occurring in the range 350–400 nm. The recorded spectra for some samples of fw with different TSS concentrations (51.6, 115.06, and 268.8 mg L<sup>-1</sup>) under various operating procedures  $h_{lm}$  (20, 40, and 60 kPa) are displayed in Figure 4(a)–4(c). After 10 h of running the filters, the TSS concentration reached 51.8 and 115 mgL<sup>-1</sup> with Er for TSS  $\approx$  79.3 and 53.9% at  $h_{lm}$  20 and 40 kPa. It follows that the Ref intensity range for fw was decreased from 55.43–99.48% with three peaks at 361, 371, and 378 nm, to 47.07–56.94% with one small peak at 355 nm. The Trans intensity range decreased from

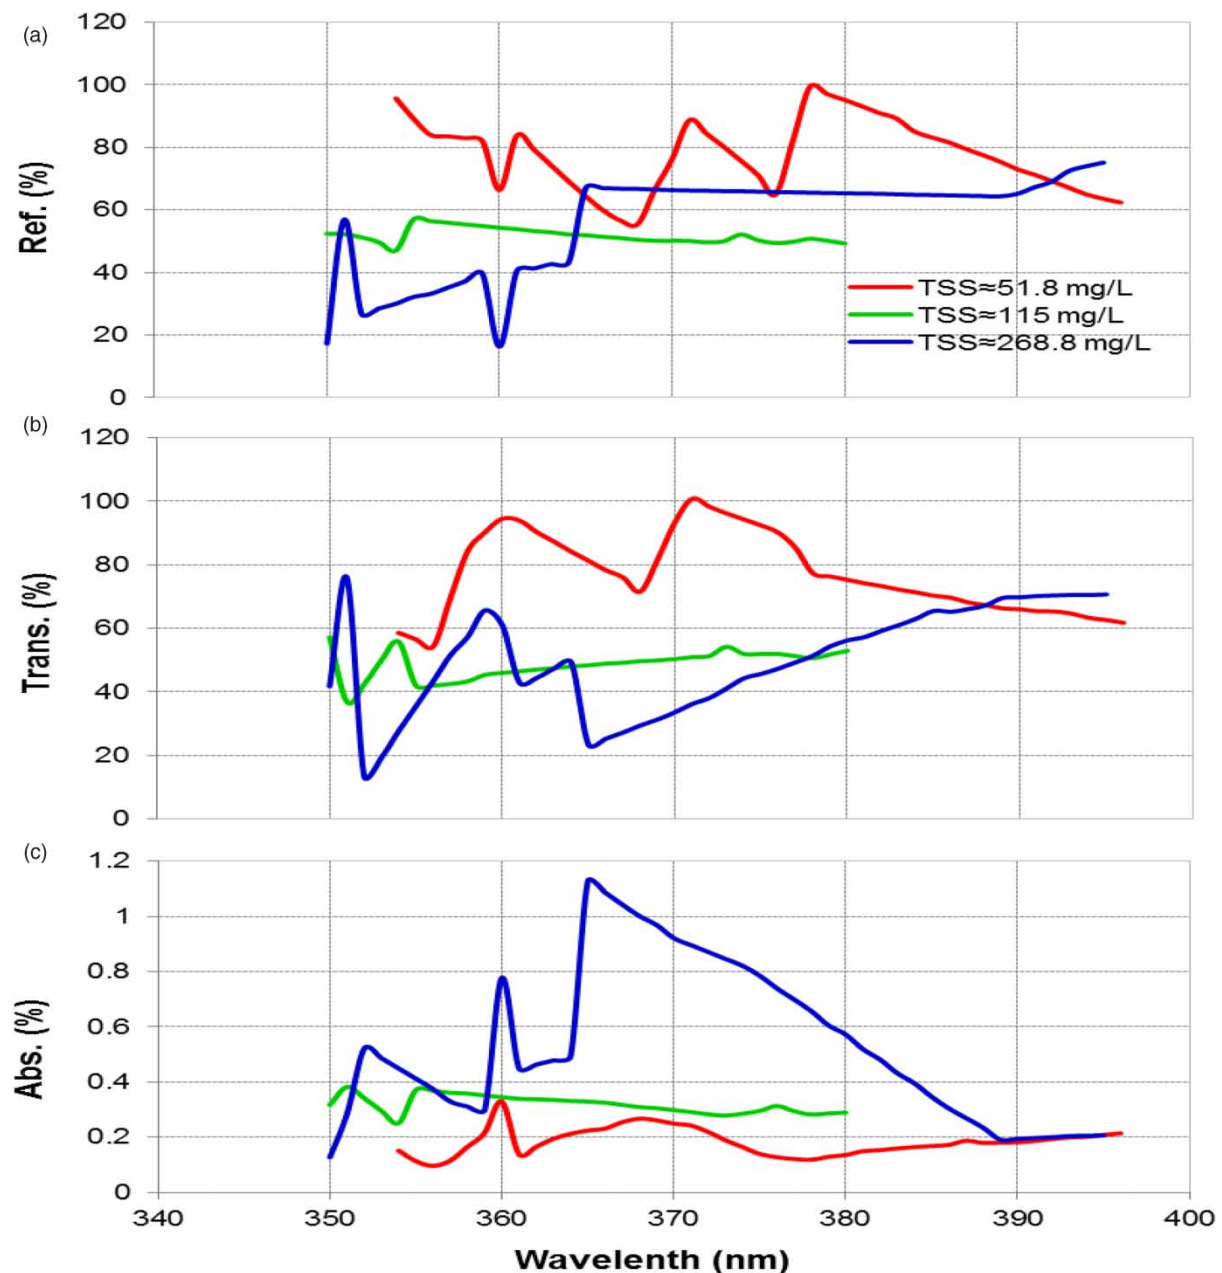

**Figure 4** | Optical properties for fw at different TSS concentrations.

54.22–99.8% with two peaks at 360 nm, and 371 nm, to 36.87–57.2% with 354 nm. Whereas, the Abs intensity range for fw with a higher TSS increased from 0.096–0.267% with one peak at 360 nm for  $hl_m \approx 20$  kPa to 0.251–0.382% with one peak also at 355 nm for  $hl_m \approx 40$  kPa.

Meanwhile, at the experiment end, with  $hl_m \approx 60$  kPa, the  $E_r$  had a negative value for both TSS (-7.7%) and Tu (-18.9%); additionally, fw became more cloudy with a greater amount of TSS and Tu. Consequently, the optical properties (Ref, and Trans) intensity ranges decreased to 16.28–75.16%, and 13.37–75.86%. In contrast, the Abs. intensity range increased from 0.096–0.267 at  $hl_m \approx 20$  kPa with  $E_r \approx 79.3$  and 82.4% for TSS and Tu in the first 10 h of the experiment, to 0.127–1.127% with -7.7 and -18.9% for TSS and Tu at the experiment end. Of these results, as the filtration process progresses, the values of  $E_r$  for both TSS and Tu decreased until the filter was clogged, and the values shifted to negative values (-7.7, -18.9%) for TSS and Tu at an  $hl_m \approx 60$  kPa; this entails an increase in TSS, Tu and water cloudiness. It follows from the above that for both the  $E_r$ , and Trans, the light decreased to 45.72, and 44.61% and there was an increase in the Abs light to 0.63% as a direct result of increasing the TSS concentration of 268.8 mg L<sup>-1</sup>. Where TSS concentrations (composition and size) scatter light efficiently owing to their high refractive index relative to the water, they influence the scattering, absorption and transmission of light (Wozniak & Stramski 2004; Williamson & Crawford 2011; Al-Yaseri *et al.* 2013). Meanwhile, Tu causes cloudiness or a decrease in the transparency of water. The direction of the transmitted light path will undergo changes, being scattered when the light hits the particles (silt, clay, algae, organic matter and micro-organisms) in the water column (Sydor 1980; Ziegler 2002).

## CONCLUSION

At different head losses the gravel filter reduced both TSS and Tu sharply at the beginning of the experiment;  $E_r$  for both had a negative relation with experiment accumulated time until the filter was clogged, and the values of  $E_r$  turned to negative values. In addition, the curves of optical properties for fw occurred in the range 350–400 nm. Furthermore, with the progress of the filtration process, and increase in head losses (from 20 to 60 kPa), both TSS and Tu in fw increased, leading to increase in the water suspended solids and pollutants, which is negatively reflected in the decrease in both Ref and Trans intensity, on the one hand, and the increase in the Abs intensity. So, the optical properties are considered a perfect indicator that can be relied upon in determining the necessity of filter backwashing.

## DATA AVAILABILITY STATEMENT

All relevant data are included in the paper or its Supplementary Information.

## REFERENCES

- Adin, A. & Alon, G. 1986 Mechanisms and process parameters of filter screens. *J. Irrig. Drain. Eng.* **112**(4), 293–304.
- Adin, A. & Elimelech, M. 1989 Particle filtration for wastewater irrigation. *J. Irrig. Drain. Eng.* **115**(3), 474–487.
- Al-Yaseri, I., Morgan, S. & Retzlaff, W. 2013 Using turbidity to determine total suspended solids in storm – water runoff from green roofs. *Journal of Environmental Engineering* **139**, 822–828.
- Arst, H. 2003 *Optical Properties and Remote Sensing of Multi Componential Water Bodies*. Springer, Praxis Publishing, Chichester, UK, p. 238.
- ASAE 2005 *Media Filters for Irrigation-Testing and Performance Reporting*. ASAE Standards, St. Joseph, MI.
- Bounoua, S., Tomas, S. & Labille, J. 2016 Understanding physical clogging in drip irrigation: in situ, in-lab and numerical approaches. *Irrig. Sci.* **34**(4), 327–342.

- Bucks, D. A., Nakayama, F. S. & Gilbert, R. G. 1979 [Trickle water quality and preventive maintenance](#). *Agric. Water Manage.* **2**(2), 149–162.
- Bukata, R. P., Jerome, J. H., Kondratyev, K. Y. & Pozdnyakov, D. V. 1995 *Optical Properties and Remote Sensing of Inland and Coastal Waters*. CRC Press, Boca Raton, FL, p. 371.
- Burt, C. M. & Styles, S. W. 2007 *Drip and Micro Irrigation Design and Management*. Irrigation Training and Research Center (ITRC), California Polytechnic State University, San Luis Obispo, CA.
- Capra, A. & Scicolone, B. 2004 [Emitter and filter tests for wastewater reuse by drip irrigation](#). *Agric. Water Manage.* **68**, 135–149.
- Capra, A. & Scicolone, B. 2007 [Recycling of poor quality urban wastewater by drip irrigation systems](#). *J. Cleaner Prod.* **15**, 1529–1534. (2 REV).
- Ceccato, P., Flasse, S., Taratola, S., Jacquemoud, S. & Gregoire, J. M. 2001 [Detecting vegetation leaf water content using reflectance in the optical domain](#). *Remote Sensing of Environment.* **77**, 22–33.
- Dalalmeh, S. H., Pell, M., Vinnerås, B., Hylander, L. D., Öborn, I. & Jönsson, H. 2012 [Efficiency of bark, activated charcoal, foam and sand filters in reducing pollutants from greywater](#). *Water Air Soil Pollut.* **223**, 3657–3671.
- Davies-Colley, R. J. & Smith, D. G. 2000 *Suspended Sediment, Turbidity and Clarity of Water, A Review*.
- Dekker, A. G. 1993 *Detection of Optical Water Quality Parameters for Eutrophic Waters by High Resolution Remote Sensing*. PhD Thesis. Vrije Universities, Amsterdam, The Netherlands, p. 240.
- Dolinar, B. 2014 [Practical application of the results for optically measured total suspended solids concentrations in the Drava River](#). *Journal of Water Resource and Protection* **6**, 710–721.
- Doxaran, D., Froidefond, J. M., Lavender, S. & Castaing, P. 2002 [Spectral signature of highly turbid waters. Application with SPOT data to quantify suspended particulate matter concentrations](#). *Remote Sensing of Environment* **81**, 149–161.
- Duran-Ros, M., Puig-Bargués, J., Arbat, G., Barragan, J. & Ramirez de Cartagena, F. 2009 [Effect of filter emitter and location on clogging when using effluents](#). *Agric. Water Manage.* **96**(1), 67–79.
- EL Awady, M. N., EL Berry, A. M., Genaidy, M. A. I. & Zayton, A. M. 2001 Engineering properties for local production of irrigation filter media. *Misr J. Ag. Eng.* **18**(4), 109–121.
- Elbana, M., Ramírez de Cartagena, F. & Puig-Bargués, J. 2012 [Effectiveness of sand media filters for removing turbidity and recovering dissolved oxygen from a reclaimed effluent used for micro-irrigation](#). *Agric. Water Manage.* **111**, 27–33.
- Elhegazy, H. & Eid, M. 2020 [A state-of-the-art-review on grey-water management: a survey from 2000s to 2020s](#). *Water Science and Technology* **82**(12), 2786–2797.
- Eurodrip. 1999 *Technical Manual for the Eurodrip Irrigation Lines*. Eurodrip, Inofyta, Greece.
- Feng, J., Li, Y. K., Wang, W. N. & Xue, S. 2018 [Effect of optimization forms of flow path on emitter hydraulic and anti-clogging performance in drip irrigation system](#). *Irrig. Sci.* **36**(1), 37–47.
- Gallegos, C. L., Davies-Colley, R. J. & Gall, M. 2008 [Optical closure in lakes with contrasting extremes of reflectance](#). *Limnol. Oceanogr.* **53**, 2021–2034.
- Haman, D. Z., Smajstrla, A. G. & Zazueta, F. S. 1994 *Media Filters for Trickle Irrigation in Florida*. AE57, Agricultural and Biological Engineering Department, Florida Cooperative Extension Service, Institute of Food and Agricultural Sciences, University of Florida, Gainesville, FL.
- Hamoda, M. F., Al-Ghusain, I. & Al-Mutairi, N. Z. 2004 [Sand filtration of wastewater for tertiary treatment and water reuse](#). *Desalination* **164**, 203–211.
- Hassan, H. E., El-Khatib, S. I. & Mahmoud, M. M. 2019 [Evaluation of drip irrigation system performance under local gravel media in laboratory](#). *AgricInternational* **6**(1), 39. doi: 10.5958/2454-8634.2019.00009.3.
- Hassan, H. E., El-Khatib, S. I. & Mahmoud, M. M. 2020 [Study some optical properties of different total suspended solids in media filters by using He-Ne laser](#). *J Opt.* **49**, 248–255. <https://doi.org/10.1007/s12596-020-00613-7>
- Kuslu, Y. & Sahin, U. 2013 [A comparison study on the removal of suspended solids from irrigation water with pumice and sand-gravel media filters in the laboratory scale](#). *Desalination and Water Treatment* **51**, 2047–2054.
- Morel, A. & Prieur, L. 1977 [Analysis of variations in ocean color](#). *Limnology and Oceanography* **22**, 709–722.
- Naghavi, B. & Malone, R. F. 1986 [Algae removal by fine sand/silt filtration](#). *Water Resources* **20**(3), 377–383.
- Nakayama, F. S., Boman, B. J. & Pitts, D. J. 2007 Maintenance. In: *Microirrigation for Crop Production. Design, Operation, and Management* (Lamm, F. R., Ayars, J. E. & Nakayama, F. S., eds). Elsevier, Amsterdam, pp. 389–430.
- Nakhla, G. & Farooq, S. 2003 [Simultaneous nitrification-denitrification in slow sand filters](#). *Journal of Hazardous Materials* **96**(2–3), 291–303.
- Neis, U. & Tiehm, A. 1997 [Particle size analysis in primary and secondary waste water effluents](#). *Water Science and Technology* **36**(4), 151–158.
- Oron, G., Shelef, G. & Turzynski, B. 1979 [Trickle irrigation using treated wastewaters](#). *Journal of Irrigation and Drainage Division* **105**(IR2), 175–186.
- Pitts, D. J., Haman, D. Z. & Smajstrla, A. G. 1990 *Causes and Prevention of Emitter Plugging in Microirrigation System*. Bulletin 258. Florida Cooperative Extension Service, Institute of Food and Agriculture Science, University of Florida, Gainesville, FL.
- Pozdnyakov, D. V. & Grassl, H. 2003 *Colour of Inland and Coastal Waters – A Methodology for its Interpretation*. Springer, London, p. 170.
- Puig-Bargués, J., Arbat, G., Barragán, J. & Ramírez de Cartagena, F. 2005a [Effluent particle removal in micro irrigation system filters](#). *Spanish Journal of Agricultural Research* **3**(2), 182–191.



- Puig-Bargués, J., Arbat, G., Barragán, J. & Ramírez de Cartagena, F. 2005b Hydraulic performance of drip irrigation subunits using WWTP effluents. *Agric. Water Manage.* **77**(1–3), 249–262.
- Puig-Bargués, J., Arbat, G., Elbana, M., Duran-Ros, M., Barragán, J., Ramírez de Cartagena, F. & Lamm, F. R. 2010 Effect of flushing frequency on emitter clogging in surface and subsurface drip irrigation. In: *International Conference on Agricultural Engineering- Ag.Eng.,2010 Towards Environmental Technologies*, 6–8 September 2010, Clermont-Ferrand, France.
- Ravina, I., Paz, E., Sofer, Z., Marcu, A., Shisha, A. & Sagi, G. 1992 Control of emitter clogging in drip irrigation with reclaimed wastewater. *Irrigation Science* **13**(3), 129–139.
- Ravina, A., Paz, E., Sofer, Z., Marcu, A., Shisha, A., Sagi, G., Yechialy, Z. & Lev, Y. 1997 Control of clogging in drip irrigation with stored treated municipal sewage effluent. *Agric. Water Manage.* **33**(1997), 127–137.
- Reinart, A., Paavel, B., Pierson, D. & Strmbeck, N. 2004 Inherent and apparent optical properties of Lake Peipsi, Estonia. *Boreal Env. Res.* **9**, 429–445.
- Rev-Herlevi, A. 2002 *Inherent and Apparent Optical Properties in Relation to Water Quality in Nordic Waters*. Academic Dissertation, Department of Geophysics, University of Helsinki, Helsinki, Finland, p. 57.
- Shock, C. 2006 *Drip Irrigation: An Introduction*. Oregon State University, Extension Service. EM 8782-E.
- Solé-Torres, C., Puig-Bargués, J., Duran-Ros, M., Arbat, G., Pujol, J. & Ramírez de Cartagena, F. 2019 Effect of different sand filter underdrain designs on emitter clogging using reclaimed effluents. *Agric. Water Manage.* **223**, 105685.
- Sydor, M. 1980 Remote sensing of particulate concentrations in water. *Applied Optics* **19**, 2794–2800.
- Tripathi, V. K., Rajput, T. B. S. & Patel, N. 2014 Performance of different filter combinations with surface and subsurface drip irrigation systems for utilizing municipal wastewater. *Irrig. Sci.* **32**, 379–391.
- Trooiën, T. P. & Hills, D. J. 2007 Application of biological effluent. In: *Microirrigation for Crop Production. Design, Operation, and Management* (Lamm, F. R., Ayars, J. E. & Nakayama, F. S., eds). Elsevier, Amsterdam, pp. 329–356.
- Wang, B. A., Linker, L. C. & Batiuk, R. A. 2010 Monitored and modeled correlations of sediment and nutrients with Chesapeake Bay water clarity. *JAWRA*. **49**(5), 1103–1118.
- Williamson, T. N. & Crawford, C. G. 2011 Estimation of suspended-sediment concentration from total suspended solids and turbidity data for Kentucky, 1978–1995. *JAWRA* **47**, 739–749.
- Wozniak, S. B. & Stramski, D. 2004 Modeling the optical properties of mineral particles suspended in seawater and their influence on ocean reflectance and chlorophyll estimation from remote sensing algorithms. *Appl. Opt.* **43**(17), 3489–3503.
- Wu, J.-L., Ho, C.-R., Huang, C.-C., Srivastav, A. L., Tzeng, J.-H. & Lin, Y.-T. 2014 Hyper spectral sensing for turbid water quality monitoring in freshwater rivers: empirical relationship between reflectance and turbidity and total solids. *Sensors* **14**, 22670–22688.
- Yentsch, C. S. 1984 Remote assessment of ocean color for interpretation of satellite visible imagery: a review. *Q. Rev. Biol.* **59**, 413983.
- Zhou, B., Li, Y., Song, P., Zhou, Y., Yu, Y. & Bralts, V. 2017 Anti-clogging evaluation for drip irrigation emitters using reclaimed water. *Irrig. Sci.* **35**(3), 181–192.
- Ziegler, A. C. 2002 Issues related to use of turbidity measurements as a surrogate for suspended sediment. In: *Proceedings of Turbidity and Other Sediment Surrogates Workshop*, April 30–May 2, 2002, Reno, NV, USA.

First received 16 January 2021; accepted in revised form 11 April 2021. Available online 30 April 2021
